# Supplementary material for: Effects of increasing ligand conjugation in Cu(i) photosensitizers on NiO semiconductor surfaces
Source: Royal Society of Chemistry journal article supplement (doi:10.1039/d3dt03890d), 2024-01-01
Supplement: d3dt03890d1.pdf [file d3dt03890d1.pdf]

Supporting information for:

**Effect of Increasing Ligand Conjugation in Cu(I) Photosensitizers on NiO  
Semiconductor Surfaces**

*Zujhar Singh<sup>1</sup>, Joseph D. Chiong<sup>1</sup>, Saeid Kamal<sup>2</sup>, Marek B. Majewski<sup>1\*</sup>*

1. Department of Chemistry and Biochemistry and Centre for NanoScience Research

Concordia University, 7141 Sherbrooke Street West, Montreal, Quebec, H4B 1R6, Canada

2. Department of Chemistry and Laboratory for Advanced Spectroscopy and Imaging

Research (LASIR), The University of British Columbia, 2036 Main Mall, Vancouver, British  
Columbia V6T 1Z1, Canada

E-mail: [marek.majewski@concordia.ca](mailto:marek.majewski@concordia.ca)

|                                                                                                                |     |
|----------------------------------------------------------------------------------------------------------------|-----|
| Experimental Procedures .....                                                                                  | S3  |
| Synthesis of dimethyl 6,6'-dimesityl-[2,2'-bipyridine]-4,4'-dicarboxylate ( <b>A</b> ) (Scheme S1.).....       | S3  |
| Synthesis of <b>L1</b> , <b>L2</b> and <b>L3</b> (Scheme S2.) .....                                            | S3  |
| Synthesis of complexes <b>A-Cu(I)-L1</b> , <b>A-Cu(I)-L2</b> , and <b>A-Cu(I)-L3</b> (Scheme S3.) .....        | S4  |
| Preparation of anchoring ligand <b>HOOC-A</b> (Scheme S4.) .....                                               | S4  |
| Results and Discussions .....                                                                                  | S5  |
| <sup>1</sup> H NMR spectra of <b>A</b> (Figure S1.).....                                                       | S5  |
| <sup>1</sup> H NMR spectra of <b>A-Cu(I)-L1</b> , <b>A-Cu(I)-L2</b> , and <b>A-Cu(I)-L3</b> (Figure S2.) ..... | S5  |
| Cyclic voltammogram of reductive side of complex <b>A-Cu(I)-L1</b> (Figure S3.).....                           | S6  |
| Photoluminescence and absorbance spectra of <b>[Cu(dmp)(A)]PF<sub>6</sub></b> (Figure S4.) .....               | S7  |
| Decay associated spectra of <b>A-Cu(I)-L3</b> (Figure S5.).....                                                | S8  |
| Femtosecond transient absorption difference spectra for <b>A-Cu(I)-L1</b> (Figure S6.) .....                   | S9  |
| Chopped-light chronoamperometry control experiments (Figure S7.) .....                                         | S9  |
| Chopped-light chronoamperometry at varying wavelengths (Figure S8.) .....                                      | S10 |

## Experimental Procedures

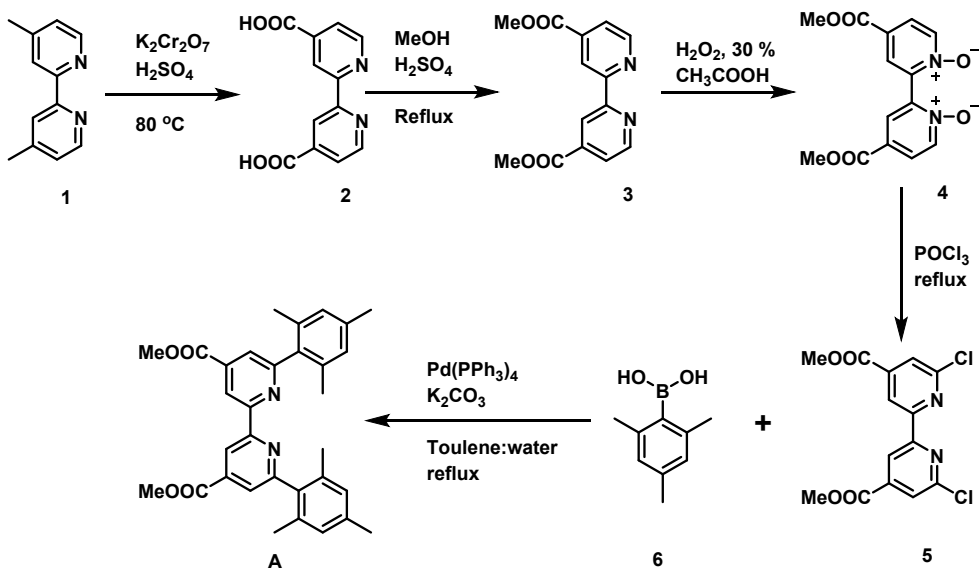

Scheme S1. Synthetic scheme for the synthesis of ligand A.

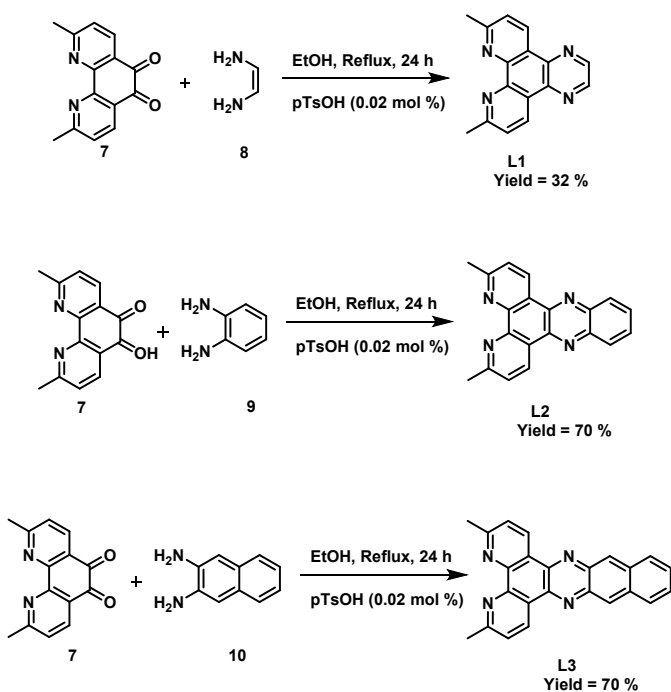

Scheme S2. Synthetic scheme for the synthesis of ligands L1, L2 and L3.

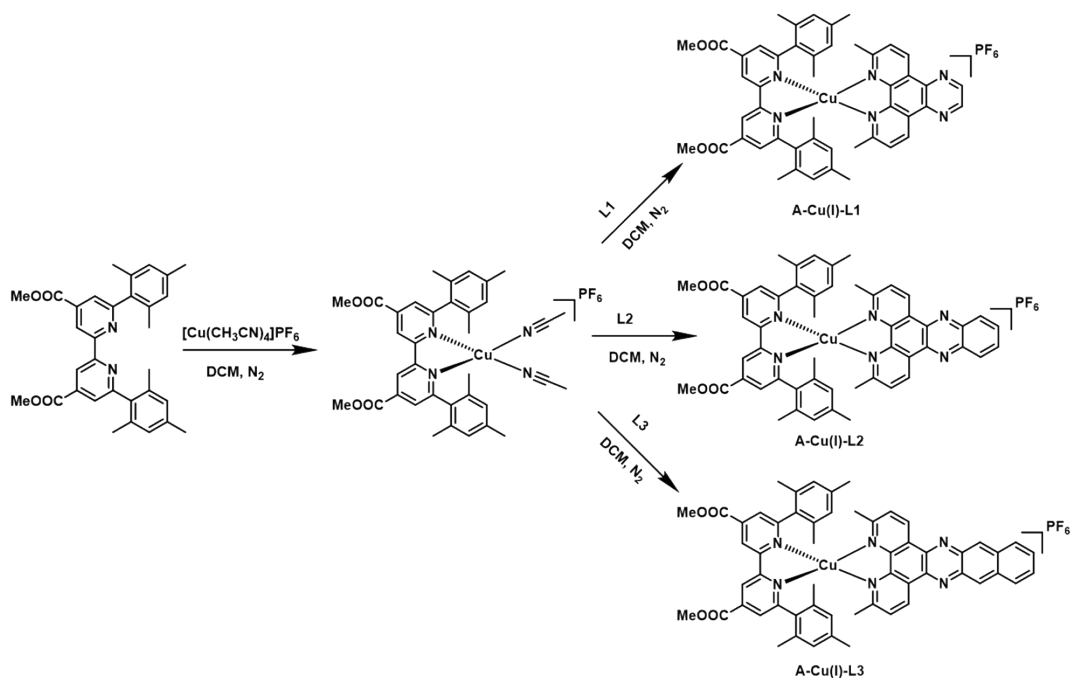

Scheme S3. HETPhen synthetic scheme for the synthesis of complexes **A-Cu(I)-L1**, **A-Cu(I)-L2**, and **A-Cu(I)-L3**.

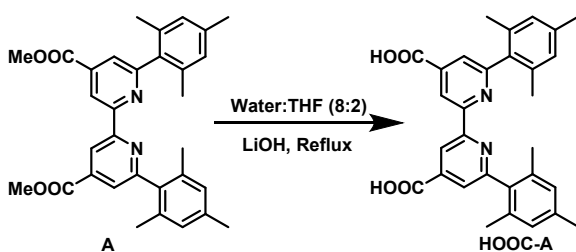

Scheme S4. Synthetic scheme for the preparation of anchoring ligand **HOOC-A**.

## Results and Discussions

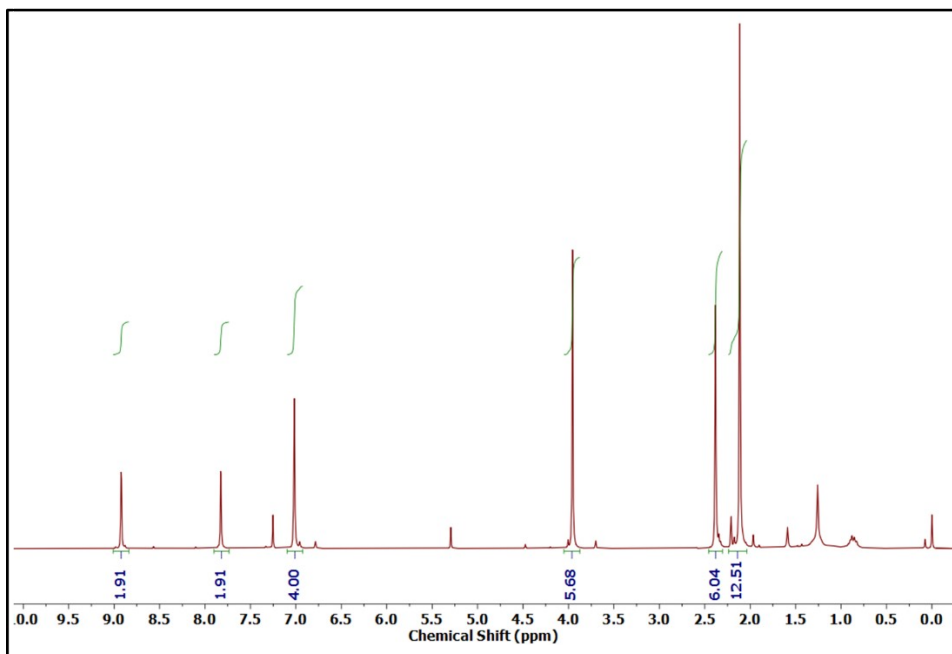

Figure S1.  $^1\text{H}$  NMR spectra of **A** ( $\text{CDCl}_3$ , 300 MHz).

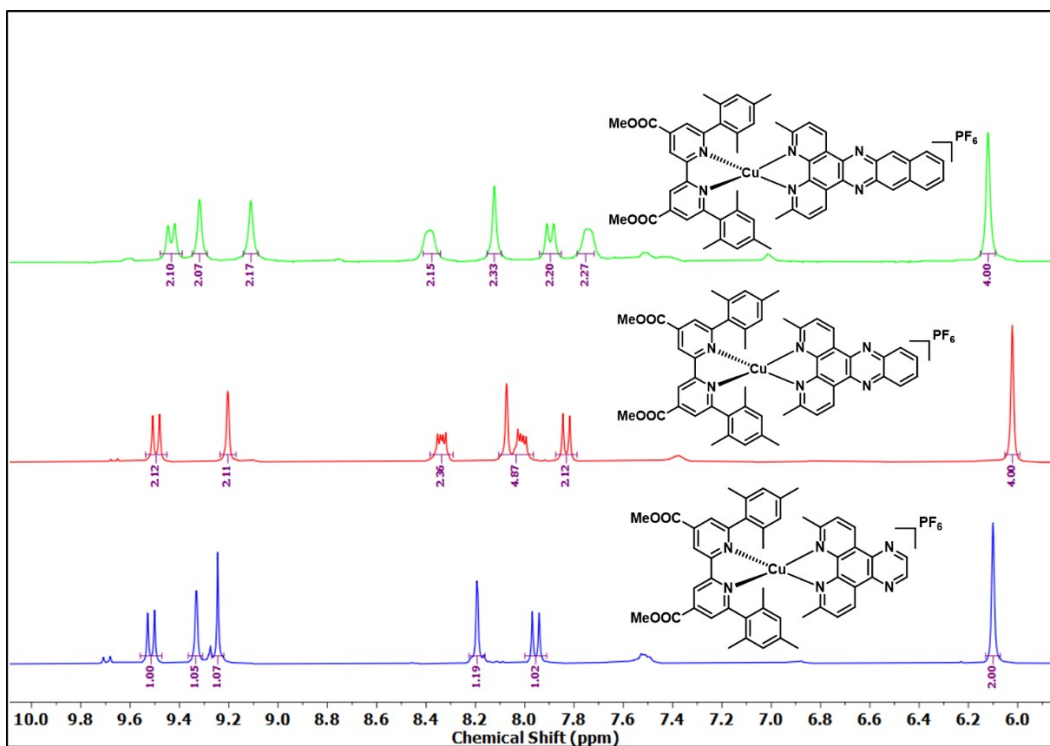

Figure S2. Overlaid  $^1\text{H}$  NMR spectra of three complexes **A-Cu(I)-L1** (blue), **A-Cu(I)-L2** (red), and **A-Cu(I)-L3** (green) [ $(\text{CD}_3)_2\text{SO}$ , 300 MHz].

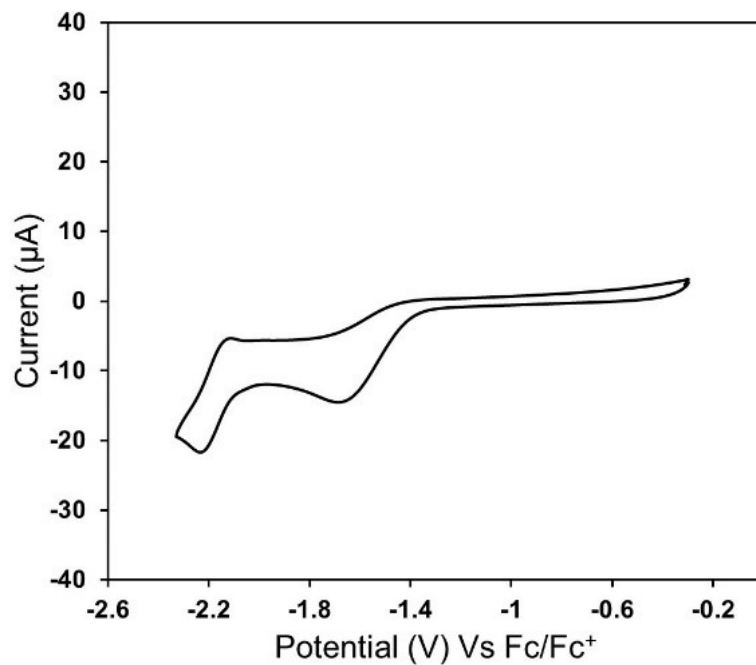

Figure S3. Cyclic voltammograms of reductive side of complex A-Cu(I)-L1. It was recorded in 0.1 M TBAPF<sub>6</sub> in DMF at  $\nu = 100$  mV/s with a 2 mm Pt button working electrode, Pt mesh as counter electrode, and Ag wire pseudoreference electrode. Potentials are reported vs. the ferrocene/ferrocenium (Fc/Fc<sup>+</sup>) redox couple through addition of ferrocene as an internal standard (not shown).

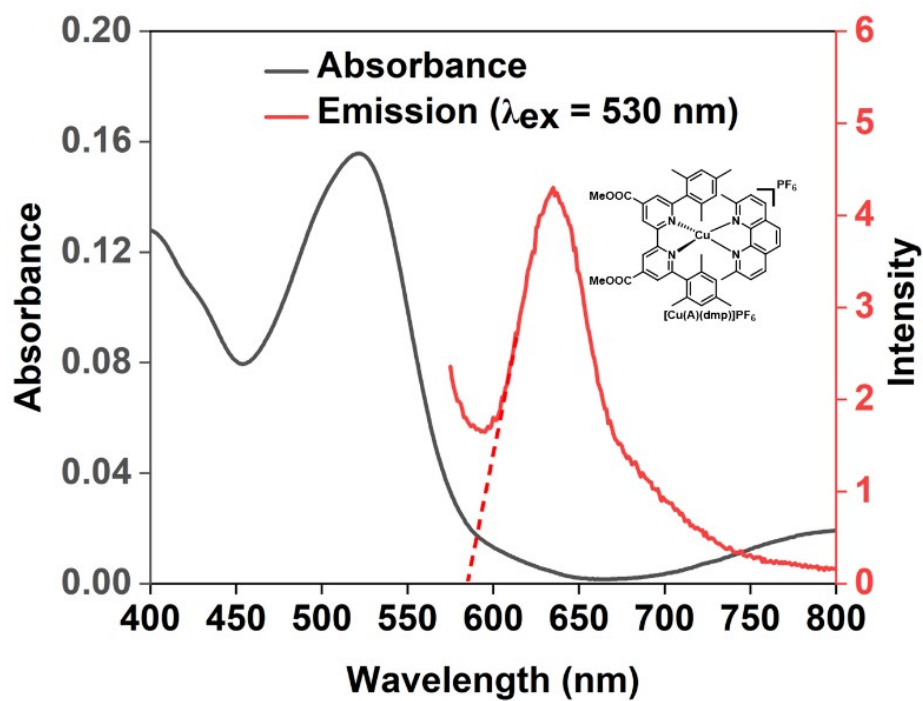

Figure S4. Overlaid photoluminescence (red) and absorbance spectra (black) of [Cu(dmp)(A)]PF<sub>6</sub>. Dashed line indicates the intersection of the absorbance and photoluminescence spectra used to calculate  $E_{00}$ . Spectra were recorded in deaerated acetonitrile at room temperature ( $\lambda_{\text{max}} = 530 \text{ nm}$ ).

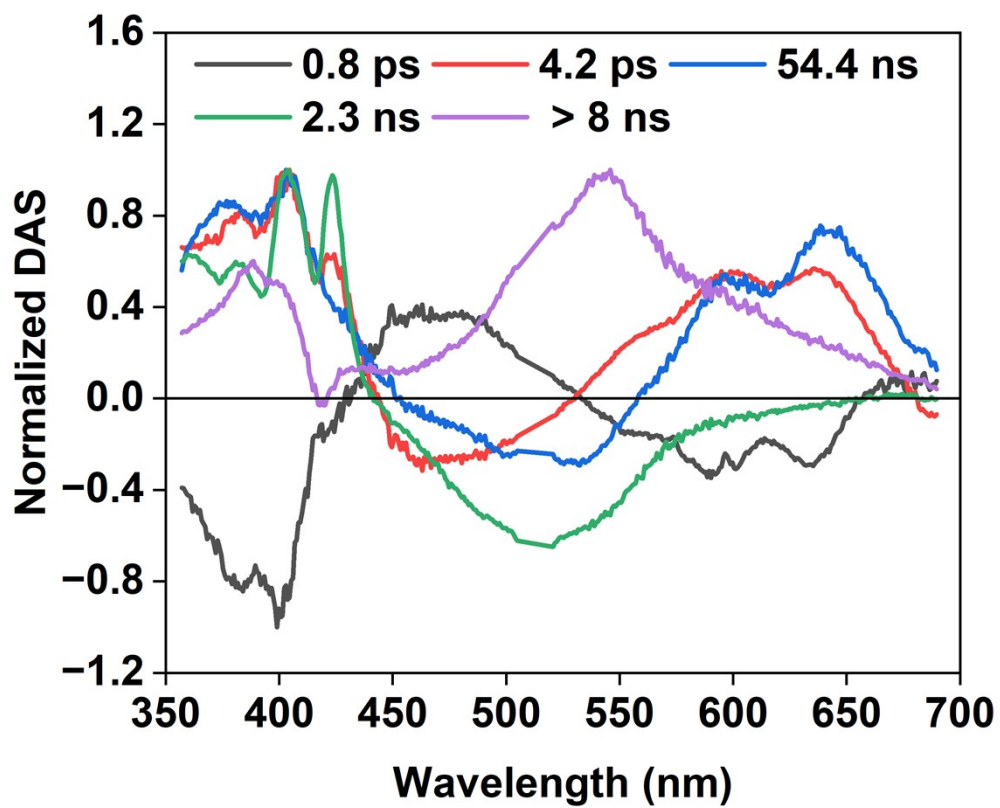

Figure S5. Decay associated spectra of A-Cu(I)-L3 collected in acetonitrile solution,  $\lambda_{\text{ex}} = 510$  nm,  $1 \mu\text{J} / \text{pulse}$ .



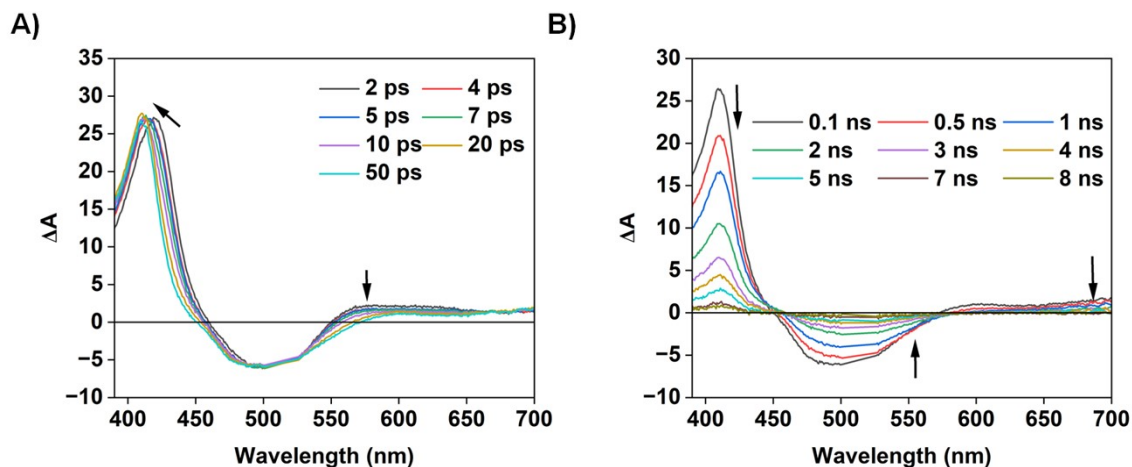

Figure S6. A) Femtosecond transient absorption difference spectra for **A-Cu(I)-L1** at shorter time delays (2-40 ps). B) Femtosecond transient absorption difference spectra for **A-Cu(I)-L1** at longer time delays (50 ps-7 ns) collected in acetonitrile solution,  $\lambda_{\text{ex}} = 510 \text{ nm}$ ,  $1 \mu\text{J} / \text{pulse}$ .

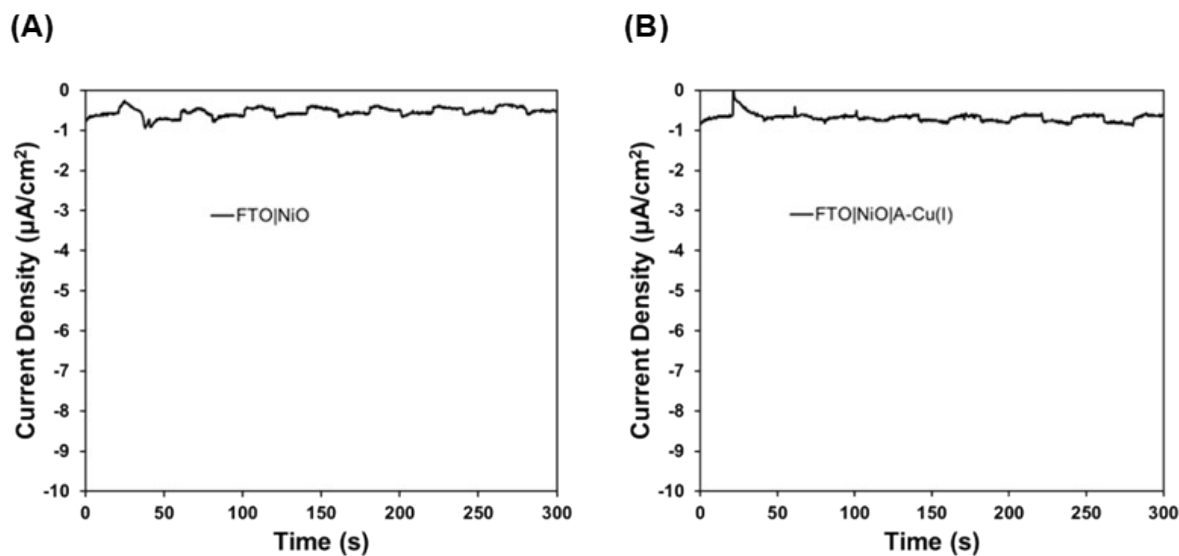

Figure S7. A) Chopped-light chronoamperometry experiment on undecorated semiconductor film FTO|NiO. B) Chopped-light chronoamperometry experiment on partially decorated semiconductor film FTO|NiO|A-Cu(I). Chronoamperograms were recorded in  $0.1 \text{ M TBAPF}_6$  in acetonitrile at  $0\text{V}$  with the film as working electrode, Ag wire as pseudoreference electrode and Pt mesh as the counter electrode.

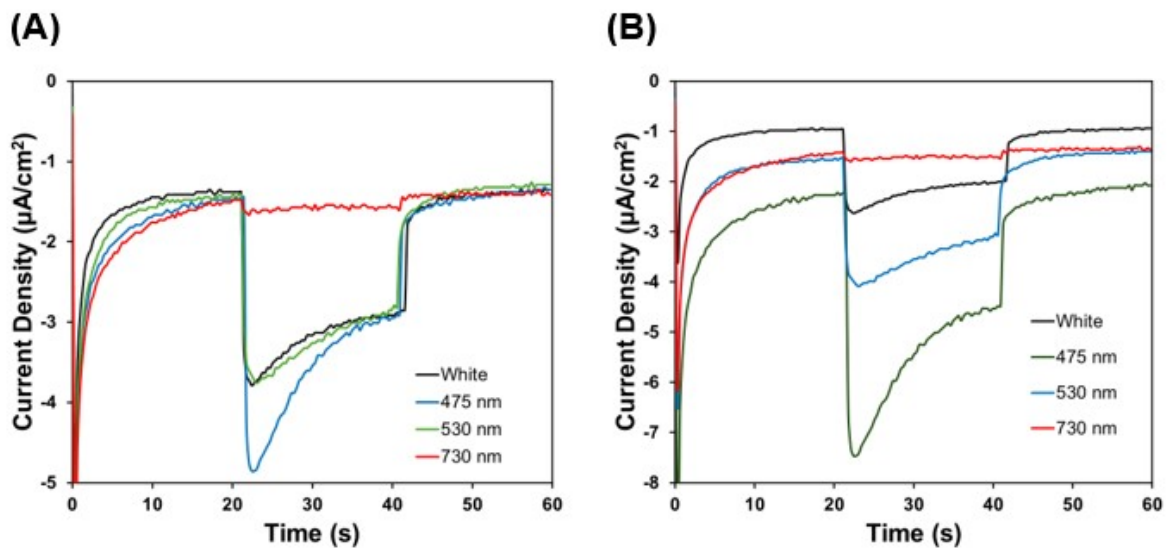

Figure S8. A) Chopped-light chronoamperometry experiment on **NiO|A-Cu(I)-L2** illuminated with a  $144 \text{ mW}/\text{cm}^2$  single white LED, a  $65 \text{ mW}/\text{cm}^2$  single blue LED (475 nm), a  $92 \text{ mW}/\text{cm}^2$  single green LED (530 nm) and a  $104 \text{ mW}/\text{cm}^2$  single red LED (730 nm). B) Chronoamperogram normalized to  $100 \text{ mW}/\text{cm}^2$ . Chronoamperograms were recorded in  $0.1 \text{ M TBAPF}_6$  in acetonitrile at  $-0.4 \text{ V}$  with the film as working electrode, Ag wire as pseudoreference electrode and Pt mesh as the counter electrode.
